# Supplementary material
Source: publisher figshare collection journal article supplement (https://tandf.figshare.com/articles/dataset/_/7851635)
Supplement: Supplementary file 1 [file 2]

# Supplementary Simulation Tables

Table 1: Sample size (empirical type I error, empirical power) for the comparison of TAR with  $\theta = 1$  and  $\bar{r} = 0.4$

|       |          | $\beta_2$ | $\rho = 0.1$     | $\rho = 0.3$     | $\rho = 0.5$     |
|-------|----------|-----------|------------------|------------------|------------------|
| CS    | Complete | 0.2       | 165(0.056,0.806) | 275(0.053,0.799) | 385(0.053,0.800) |
|       |          | 0.25      | 103(0.060,0.802) | 172(0.053,0.813) | 240(0.053,0.795) |
|       |          | 0.3       | 70(0.056,0.807)  | 116(0.049,0.797) | 162(0.055,0.796) |
|       | IM       | 0.2       | 181(0.049,0.797) | 291(0.051,0.800) | 400(0.046,0.792) |
|       |          | 0.25      | 113(0.057,0.814) | 181(0.054,0.788) | 249(0.060,0.795) |
|       |          | 0.3       | 76(0.058,0.795)  | 123(0.064,0.803) | 169(0.063,0.814) |
|       | MM       | 0.2       | 185(0.047,0.794) | 302(0.054,0.797) | 419(0.053,0.793) |
|       |          | 0.25      | 115(0.048,0.800) | 188(0.057,0.794) | 261(0.050,0.789) |
|       |          | 0.3       | 78(0.058,0.818)  | 127(0.060,0.802) | 177(0.054,0.816) |
| AR(1) | Complete | 0.2       | 130(0.059,0.810) | 182(0.059,0.804) | 258(0.051,0.804) |
|       |          | 0.25      | 81(0.060,0.807)  | 114(0.056,0.808) | 161(0.055,0.805) |
|       |          | 0.3       | 55(0.052,0.814)  | 77(0.052,0.822)  | 109(0.058,0.809) |
|       | IM       | 0.2       | 146(0.058,0.800) | 198(0.058,0.811) | 274(0.048,0.806) |
|       |          | 0.25      | 91(0.054,0.821)  | 124(0.050,0.821) | 171(0.057,0.808) |
|       |          | 0.3       | 62(0.061,0.818)  | 84(0.063,0.807)  | 116(0.061,0.800) |
|       | MM       | 0.2       | 148(0.057,0.806) | 205(0.051,0.800) | 287(0.049,0.807) |
|       |          | 0.25      | 92(0.058,0.816)  | 128(0.053,0.810) | 179(0.054,0.808) |
|       |          | 0.5       | 63(0.055,0.812)  | 87(0.064,0.811)  | 121(0.058,0.806) |

Table 2: Sample size (empirical type I error, empirical power) for the comparison of TAR with  $\theta = 2$  and  $\bar{r} = 0.4$

|       |          | $\beta_2$ | $\rho = 0.1$     | $\rho = 0.3$     | $\rho = 0.5$     |
|-------|----------|-----------|------------------|------------------|------------------|
| CS    | Complete | 0.2       | 330(0.053,0.802) | 550(0.057,0.785) | 770(0.068,0.789) |
|       |          | 0.25      | 206(0.062,0.818) | 343(0.052,0.793) | 480(0.067,0.797) |
|       |          | 0.3       | 139(0.058,0.805) | 232(0.056,0.804) | 324(0.057,0.791) |
|       | IM       | 0.2       | 361(0.048,0.795) | 581(0.047,0.792) | 800(0.063,0.779) |
|       |          | 0.25      | 225(0.053,0.811) | 362(0.053,0.793) | 498(0.058,0.779) |
|       |          | 0.3       | 152(0.051,0.818) | 245(0.056,0.786) | 337(0.051,0.782) |
|       | MM       | 0.2       | 369(0.047,0.795) | 603(0.059,0.788) | 838(0.053,0.788) |
|       |          | 0.25      | 230(0.052,0.810) | 376(0.052,0.788) | 522(0.055,0.798) |
|       |          | 0.3       | 156(0.055,0.811) | 254(0.054,0.791) | 353(0.060,0.793) |
| AR(1) | Complete | 0.2       | 260(0.051,0.796) | 364(0.057,0.827) | 516(0.052,0.806) |
|       |          | 0.25      | 162(0.054,0.803) | 227(0.057,0.813) | 321(0.050,0.804) |
|       |          | 0.3       | 110(0.054,0.812) | 154(0.056,0.814) | 217(0.055,0.809) |
|       | IM       | 0.2       | 292(0.048,0.809) | 396(0.050,0.808) | 548(0.056,0.798) |
|       |          | 0.25      | 182(0.053,0.805) | 247(0.057,0.803) | 341(0.050,0.796) |
|       |          | 0.3       | 123(0.057,0.803) | 167(0.056,0.814) | 231(0.056,0.803) |
|       | MM       | 0.2       | 296(0.056,0.806) | 410(0.056,0.802) | 574(0.049,0.799) |
|       |          | 0.25      | 184(0.053,0.799) | 255(0.057,0.821) | 358(0.051,0.816) |
|       |          | 0.5       | 125(0.054,0.816) | 173(0.055,0.815) | 242(0.051,0.818) |

Table 3: Sample size (empirical type I error, empirical power) for the comparison of TAR with  $\theta = 3$  and  $\bar{r} = 0.4$

|       |          | $\beta_2$ | $\rho = 0.1$     | $\rho = 0.3$     | $\rho = 0.5$      |
|-------|----------|-----------|------------------|------------------|-------------------|
| CS    | Complete | 0.2       | 495(0.051,0.815) | 825(0.057,0.798) | 1154(0.063,0.779) |
|       |          | 0.25      | 308(0.046,0.808) | 514(0.059,0.786) | 719(0.057,0.779)  |
|       |          | 0.3       | 209(0.060,0.814) | 348(0.059,0.803) | 486(0.062,0.787)  |
|       | IM       | 0.2       | 542(0.053,0.805) | 871(0.058,0.783) | 1200(0.063,0.801) |
|       |          | 0.25      | 338(0.048,0.804) | 543(0.063,0.792) | 747(0.058,0.787)  |
|       |          | 0.3       | 228(0.054,0.807) | 367(0.055,0.788) | 506(0.056,0.794)  |
|       | MM       | 0.2       | 553(0.050,0.813) | 905(0.061,0.790) | 1256(0.068,0.774) |
|       |          | 0.25      | 345(0.062,0.804) | 564(0.054,0.798) | 783(0.054,0.795)  |
|       |          | 0.3       | 233(0.060,0.815) | 381(0.062,0.790) | 529(0.058,0.796)  |
| AR(1) | Complete | 0.2       | 390(0.058,0.796) | 546(0.052,0.806) | 773(0.056,0.801)  |
|       |          | 0.25      | 243(0.058,0.814) | 340(0.054,0.814) | 482(0.059,0.817)  |
|       |          | 0.3       | 164(0.059,0.811) | 230(0.058,0.804) | 326(0.050,0.812)  |
|       | IM       | 0.2       | 437(0.056,0.812) | 593(0.052,0.807) | 821(0.049,0.800)  |
|       |          | 0.25      | 273(0.057,0.814) | 370(0.058,0.812) | 512(0.054,0.803)  |
|       |          | 0.3       | 184(0.048,0.809) | 250(0.056,0.799) | 346(0.053,0.808)  |
|       | MM       | 0.2       | 443(0.057,0.810) | 614(0.041,0.803) | 861(0.063,0.802)  |
|       |          | 0.25      | 276(0.056,0.808) | 383(0.053,0.819) | 536(0.055,0.806)  |
|       |          | 0.5       | 187(0.050,0.811) | 259(0.047,0.806) | 363(0.058,0.806)  |

Table 4: Sample size (empirical type I error, empirical power) for the comparison of TAR with  $\theta = 1$  and  $\bar{r} = 0.6$

|       |          | $\beta_2$ | $\rho = 0.1$     | $\rho = 0.3$     | $\rho = 0.5$     |
|-------|----------|-----------|------------------|------------------|------------------|
| CS    | Complete | 0.2       | 172(0.052,0.820) | 286(0.054,0.811) | 401(0.056,0.791) |
|       |          | 0.25      | 108(0.052,0.825) | 180(0.053,0.801) | 252(0.051,0.818) |
|       |          | 0.3       | 74(0.062,0.832)  | 123(0.055,0.811) | 172(0.049,0.820) |
|       | IM       | 0.2       | 188(0.058,0.808) | 302(0.061,0.809) | 417(0.056,0.799) |
|       |          | 0.25      | 119(0.055,0.818) | 190(0.058,0.814) | 262(0.052,0.801) |
|       |          | 0.3       | 81(0.068,0.816)  | 130(0.058,0.805) | 179(0.058,0.819) |
|       | MM       | 0.2       | 192(0.056,0.817) | 314(0.049,0.806) | 436(0.044,0.807) |
|       |          | 0.25      | 121(0.053,0.822) | 198(0.049,0.800) | 275(0.053,0.808) |
|       |          | 0.3       | 83(0.054,0.816)  | 135(0.059,0.818) | 188(0.053,0.818) |
| AR(1) | Complete | 0.2       | 136(0.053,0.810) | 190(0.049,0.815) | 269(0.054,0.822) |
|       |          | 0.25      | 85(0.052,0.825)  | 119(0.054,0.818) | 169(0.052,0.825) |
|       |          | 0.3       | 59(0.056,0.839)  | 82(0.060,0.824)  | 116(0.055,0.822) |
|       | IM       | 0.2       | 152(0.049,0.813) | 206(0.054,0.816) | 285(0.051,0.808) |
|       |          | 0.25      | 96(0.048,0.828)  | 130(0.054,0.823) | 180(0.049,0.818) |
|       |          | 0.3       | 66(0.058,0.813)  | 89(0.060,0.830)  | 123(0.056,0.820) |
|       | MM       | 0.2       | 154(0.057,0.823) | 213(0.053,0.812) | 299(0.046,0.809) |
|       |          | 0.25      | 97(0.058,0.821)  | 134(0.054,0.821) | 188(0.053,0.816) |
|       |          | 0.5       | 66(0.056,0.827)  | 92(0.058,0.831)  | 129(0.060,0.833) |

Table 5: Sample size (empirical type I error, empirical power) for the comparison of TAR with  $\theta = 2$  and  $\bar{r} = 0.6$

|       |          | $\beta_2$ | $\rho = 0.1$     | $\rho = 0.3$     | $\rho = 0.5$     |
|-------|----------|-----------|------------------|------------------|------------------|
| CS    | Complete | 0.2       | 344(0.054,0.816) | 572(0.062,0.803) | 801(0.062,0.786) |
|       |          | 0.25      | 216(0.058,0.821) | 360(0.058,0.805) | 504(0.057,0.801) |
|       |          | 0.3       | 148(0.059,0.817) | 246(0.056,0.813) | 344(0.055,0.800) |
|       | IM       | 0.2       | 376(0.052,0.813) | 604(0.059,0.808) | 833(0.061,0.787) |
|       |          | 0.25      | 237(0.056,0.809) | 380(0.062,0.788) | 524(0.052,0.808) |
|       |          | 0.3       | 162(0.054,0.830) | 260(0.057,0.803) | 358(0.059,0.794) |
|       | MM       | 0.2       | 384(0.054,0.818) | 628(0.055,0.805) | 872(0.059,0.791) |
|       |          | 0.25      | 242(0.056,0.806) | 395(0.055,0.791) | 549(0.058,0.798) |
|       |          | 0.3       | 165(0.053,0.809) | 270(0.056,0.803) | 375(0.057,0.796) |
| AR(1) | Complete | 0.2       | 271(0.047,0.807) | 379(0.053,0.816) | 537(0.051,0.823) |
|       |          | 0.25      | 170(0.053,0.818) | 238(0.054,0.817) | 338(0.053,0.820) |
|       |          | 0.3       | 117(0.064,0.826) | 163(0.057,0.814) | 231(0.051,0.823) |
|       | IM       | 0.2       | 304(0.049,0.800) | 412(0.057,0.823) | 570(0.054,0.815) |
|       |          | 0.25      | 191(0.054,0.806) | 259(0.051,0.816) | 359(0.048,0.828) |
|       |          | 0.3       | 131(0.054,0.812) | 177(0.055,0.816) | 245(0.063,0.814) |
|       | MM       | 0.2       | 308(0.053,0.824) | 426(0.061,0.824) | 597(0.058,0.823) |
|       |          | 0.25      | 194(0.052,0.813) | 268(0.057,0.828) | 376(0.053,0.815) |
|       |          | 0.5       | 132(0.054,0.819) | 183(0.053,0.827) | 257(0.048,0.816) |

Table 6: Sample size (empirical type I error, empirical power) for the comparison of TAR with  $\theta = 3$  and  $\bar{r} = 0.6$

|       |          | $\beta_2$ | $\rho = 0.1$     | $\rho = 0.3$     | $\rho = 0.5$      |
|-------|----------|-----------|------------------|------------------|-------------------|
| CS    | Complete | 0.2       | 515(0.052,0.813) | 858(0.057,0.802) | 1201(0.071,0.787) |
|       |          | 0.25      | 324(0.051,0.814) | 540(0.061,0.800) | 756(0.063,0.792)  |
|       |          | 0.3       | 222(0.055,0.822) | 369(0.051,0.802) | 516(0.063,0.799)  |
|       | IM       | 0.2       | 564(0.056,0.802) | 906(0.055,0.811) | 1249(0.061,0.788) |
|       |          | 0.25      | 355(0.049,0.817) | 570(0.058,0.810) | 786(0.061,0.788)  |
|       |          | 0.3       | 242(0.058,0.812) | 390(0.051,0.803) | 537(0.063,0.798)  |
|       | MM       | 0.2       | 576(0.052,0.806) | 942(0.066,0.789) | 1307(0.058,0.806) |
|       |          | 0.25      | 362(0.055,0.822) | 592(0.058,0.801) | 823(0.061,0.790)  |
|       |          | 0.3       | 247(0.056,0.807) | 405(0.054,0.801) | 562(0.063,0.807)  |
| AR(1) | Complete | 0.2       | 406(0.053,0.820) | 568(0.056,0.819) | 805(0.058,0.810)  |
|       |          | 0.25      | 255(0.055,0.825) | 357(0.047,0.819) | 506(0.053,0.807)  |
|       |          | 0.3       | 175(0.056,0.824) | 244(0.059,0.825) | 346(0.049,0.829)  |
|       | IM       | 0.2       | 455(0.052,0.816) | 618(0.063,0.825) | 855(0.056,0.821)  |
|       |          | 0.25      | 286(0.057,0.813) | 389(0.052,0.820) | 538(0.052,0.803)  |
|       |          | 0.3       | 196(0.053,0.824) | 266(0.057,0.814) | 367(0.056,0.814)  |
|       | MM       | 0.2       | 461(0.058,0.812) | 639(0.044,0.814) | 896(0.057,0.802)  |
|       |          | 0.25      | 290(0.052,0.824) | 402(0.058,0.822) | 564(0.055,0.809)  |
|       |          | 0.5       | 198(0.056,0.824) | 275(0.049,0.817) | 385(0.051,0.812)  |

Table 7: Sample size (empirical type I error, empirical power) for the comparison of slopes with  $\theta = 1$  and  $\bar{r} = 0.4$

|       |          | $\beta_4$ | $\rho = 0.1$     | $\rho = 0.3$     | $\rho = 0.5$     |
|-------|----------|-----------|------------------|------------------|------------------|
| CS    | Complete | 0.05      | 394(0.049,0.793) | 313(0.044,0.798) | 233(0.051,0.801) |
|       |          | 0.075     | 168(0.056,0.808) | 134(0.051,0.811) | 101(0.063,0.808) |
|       |          | 0.1       | 91(0.055,0.810)  | 73(0.063,0.806)  | 55(0.063,0.796)  |
|       | IM       | 0.05      | 457(0.056,0.791) | 377(0.051,0.803) | 296(0.048,0.818) |
|       |          | 0.075     | 195(0.046,0.809) | 161(0.057,0.800) | 127(0.059,0.813) |
|       |          | 0.1       | 105(0.051,0.811) | 87(0.058,0.801)  | 70(0.055,0.821)  |
|       | MM       | 0.05      | 459(0.056,0.816) | 382(0.053,0.798) | 304(0.058,0.815) |
|       |          | 0.075     | 195(0.054,0.796) | 163(0.055,0.794) | 131(0.056,0.798) |
|       |          | 0.1       | 105(0.064,0.815) | 88(0.061,0.808)  | 71(0.067,0.789)  |
| AR(1) | Complete | 0.05      | 478(0.049,0.806) | 560(0.054,0.806) | 606(0.056,0.794) |
|       |          | 0.075     | 203(0.058,0.810) | 238(0.052,0.818) | 258(0.048,0.812) |
|       |          | 0.1       | 110(0.062,0.803) | 128(0.058,0.801) | 139(0.048,0.802) |
|       | IM       | 0.05      | 542(0.050,0.813) | 626(0.056,0.810) | 672(0.049,0.810) |
|       |          | 0.075     | 230(0.059,0.816) | 266(0.056,0.796) | 286(0.059,0.816) |
|       |          | 0.1       | 124(0.052,0.793) | 143(0.044,0.828) | 154(0.052,0.804) |
|       | MM       | 0.05      | 547(0.048,0.810) | 638(0.051,0.819) | 691(0.049,0.795) |
|       |          | 0.075     | 232(0.057,0.806) | 271(0.052,0.804) | 294(0.054,0.813) |
|       |          | 0.1       | 125(0.060,0.817) | 146(0.053,0.798) | 158(0.056,0.804) |

Table 8: Sample size (empirical type I error, empirical power) for the comparison of slopes with  $\theta = 2$  and  $\bar{r} = 0.4$

|       |          | $\beta_4$ | $\rho = 0.1$      | $\rho = 0.3$      | $\rho = 0.5$      |
|-------|----------|-----------|-------------------|-------------------|-------------------|
| CS    | Complete | 0.05      | 787(0.045,0.791)  | 626(0.054,0.811)  | 466(0.063,0.790)  |
|       |          | 0.075     | 335(0.052,0.812)  | 268(0.057,0.809)  | 201(0.058,0.826)  |
|       |          | 0.1       | 181(0.050,0.806)  | 145(0.049,0.818)  | 110(0.061,0.806)  |
|       | IM       | 0.05      | 914(0.056,0.789)  | 753(0.047,0.802)  | 591(0.053,0.770)  |
|       |          | 0.075     | 389(0.055,0.812)  | 321(0.056,0.800)  | 254(0.053,0.805)  |
|       |          | 0.1       | 210(0.053,0.817)  | 174(0.056,0.814)  | 139(0.065,0.803)  |
|       | MM       | 0.05      | 918(0.046,0.802)  | 763(0.053,0.798)  | 608(0.071,0.790)  |
|       |          | 0.075     | 390(0.051,0.809)  | 325(0.054,0.804)  | 261(0.062,0.800)  |
|       |          | 0.1       | 210(0.055,0.809)  | 176(0.068,0.806)  | 142(0.067,0.799)  |
| AR(1) | Complete | 0.05      | 955(0.056,0.808)  | 1120(0.049,0.814) | 1211(0.052,0.818) |
|       |          | 0.075     | 406(0.049,0.802)  | 476(0.054,0.817)  | 515(0.048,0.821)  |
|       |          | 0.1       | 219(0.051,0.811)  | 256(0.062,0.810)  | 278(0.054,0.814)  |
|       | IM       | 0.05      | 1084(0.061,0.802) | 1251(0.050,0.807) | 1343(0.044,0.790) |
|       |          | 0.075     | 460(0.065,0.809)  | 531(0.063,0.806)  | 571(0.053,0.814)  |
|       |          | 0.1       | 248(0.052,0.806)  | 286(0.056,0.792)  | 308(0.061,0.802)  |
|       | MM       | 0.05      | 1093(0.051,0.800) | 1276(0.054,0.804) | 1381(0.051,0.790) |
|       |          | 0.075     | 464(0.058,0.794)  | 542(0.050,0.808)  | 587(0.054,0.809)  |
|       |          | 0.1       | 250(0.051,0.810)  | 292(0.054,0.822)  | 316(0.060,0.802)  |



Table 9: Sample size (empirical type I error, empirical power) for the comparison of slopes with  $\theta = 3$  and  $\bar{r} = 0.4$

|       |          | $\beta_4$ | $\rho = 0.1$      | $\rho = 0.3$      | $\rho = 0.5$      |
|-------|----------|-----------|-------------------|-------------------|-------------------|
| CS    | Complete | 0.05      | 1180(0.051,0.791) | 939(0.068,0.797)  | 698(0.058,0.804)  |
|       |          | 0.075     | 502(0.060,0.802)  | 402(0.052,0.825)  | 301(0.060,0.803)  |
|       |          | 0.1       | 271(0.051,0.825)  | 218(0.057,0.817)  | 165(0.061,0.812)  |
|       | IM       | 0.05      | 1371(0.051,0.804) | 1129(0.053,0.798) | 886(0.064,0.799)  |
|       |          | 0.075     | 583(0.054,0.812)  | 482(0.046,0.813)  | 381(0.066,0.807)  |
|       |          | 0.1       | 314(0.057,0.812)  | 261(0.054,0.822)  | 208(0.061,0.819)  |
|       | MM       | 0.05      | 1377(0.048,0.805) | 1145(0.060,0.805) | 912(0.072,0.800)  |
|       |          | 0.075     | 585(0.056,0.803)  | 488(0.066,0.806)  | 391(0.059,0.793)  |
|       |          | 0.1       | 315(0.051,0.809)  | 264(0.062,0.796)  | 212(0.061,0.797)  |
| AR(1) | Complete | 0.05      | 1433(0.045,0.790) | 1679(0.056,0.799) | 1816(0.047,0.810) |
|       |          | 0.075     | 608(0.051,0.806)  | 713(0.056,0.817)  | 772(0.052,0.821)  |
|       |          | 0.1       | 328(0.051,0.789)  | 384(0.054,0.808)  | 417(0.050,0.810)  |
|       | IM       | 0.05      | 1626(0.051,0.803) | 1876(0.060,0.792) | 2014(0.044,0.813) |
|       |          | 0.075     | 690(0.052,0.819)  | 797(0.050,0.817)  | 856(0.051,0.801)  |
|       |          | 0.1       | 372(0.055,0.812)  | 429(0.051,0.820)  | 462(0.054,0.821)  |
|       | MM       | 0.05      | 1639(0.050,0.812) | 1914(0.061,0.812) | 2072(0.046,0.809) |
|       |          | 0.075     | 696(0.052,0.812)  | 812(0.050,0.832)  | 880(0.054,0.803)  |
|       |          | 0.1       | 374(0.051,0.811)  | 437(0.053,0.821)  | 474(0.050,0.818)  |

Table 10: Sample size (empirical type I error, empirical power) for the comparison of slopes with  $\theta = 1$  and  $\bar{r} = 0.6$

|       |          | $\beta_4$ | $\rho = 0.1$     | $\rho = 0.3$     | $\rho = 0.5$     |
|-------|----------|-----------|------------------|------------------|------------------|
| CS    | Complete | 0.05      | 407(0.059,0.792) | 323(0.051,0.806) | 239(0.055,0.797) |
|       |          | 0.075     | 176(0.059,0.819) | 140(0.053,0.804) | 104(0.059,0.800) |
|       |          | 0.1       | 97(0.061,0.804)  | 77(0.064,0.790)  | 58(0.065,0.803)  |
|       | IM       | 0.05      | 473(0.044,0.801) | 388(0.059,0.810) | 304(0.049,0.793) |
|       |          | 0.075     | 205(0.050,0.800) | 168(0.051,0.806) | 132(0.061,0.804) |
|       |          | 0.1       | 112(0.056,0.788) | 93(0.056,0.803)  | 73(0.055,0.805)  |
|       | MM       | 0.05      | 475(0.045,0.802) | 394(0.054,0.803) | 314(0.046,0.801) |
|       |          | 0.075     | 205(0.055,0.816) | 171(0.062,0.804) | 136(0.054,0.792) |
|       |          | 0.1       | 113(0.059,0.796) | 94(0.054,0.802)  | 75(0.059,0.793)  |
| AR(1) | Complete | 0.05      | 494(0.050,0.796) | 579(0.053,0.810) | 626(0.059,0.817) |
|       |          | 0.075     | 214(0.047,0.801) | 250(0.058,0.803) | 271(0.055,0.803) |
|       |          | 0.1       | 117(0.057,0.801) | 137(0.052,0.813) | 148(0.052,0.798) |
|       | IM       | 0.05      | 561(0.053,0.797) | 647(0.049,0.805) | 694(0.053,0.798) |
|       |          | 0.075     | 242(0.049,0.814) | 280(0.058,0.806) | 300(0.047,0.800) |
|       |          | 0.1       | 133(0.057,0.806) | 153(0.058,0.802) | 165(0.057,0.803) |
|       | MM       | 0.05      | 566(0.044,0.819) | 660(0.051,0.804) | 715(0.051,0.810) |
|       |          | 0.075     | 244(0.061,0.810) | 285(0.056,0.808) | 309(0.059,0.801) |
|       |          | 0.1       | 134(0.048,0.810) | 156(0.054,0.803) | 169(0.051,0.800) |

Table 11: Sample size (empirical type I error, empirical power) for the comparison of slopes with  $\theta = 2$  and  $\bar{r} = 0.6$

|       |          | $\beta_4$ | $\rho = 0.1$      | $\rho = 0.3$      | $\rho = 0.5$      |
|-------|----------|-----------|-------------------|-------------------|-------------------|
| CS    | Complete | 0.05      | 813(0.052,0.811)  | 645(0.054,0.818)  | 477(0.063,0.802)  |
|       |          | 0.075     | 352(0.064,0.808)  | 280(0.054,0.814)  | 208(0.054,0.794)  |
|       |          | 0.1       | 193(0.052,0.813)  | 154(0.056,0.800)  | 115(0.064,0.821)  |
|       | IM       | 0.05      | 945(0.050,0.797)  | 776(0.058,0.805)  | 607(0.063,0.796)  |
|       |          | 0.075     | 409(0.060,0.820)  | 336(0.057,0.804)  | 264(0.058,0.790)  |
|       |          | 0.1       | 224(0.056,0.811)  | 185(0.063,0.808)  | 146(0.067,0.799)  |
|       | MM       | 0.05      | 950(0.057,0.801)  | 788(0.053,0.799)  | 627(0.063,0.788)  |
|       |          | 0.075     | 410(0.049,0.799)  | 341(0.056,0.804)  | 272(0.060,0.806)  |
|       |          | 0.1       | 225(0.059,0.808)  | 187(0.056,0.795)  | 150(0.054,0.810)  |
| AR(1) | Complete | 0.05      | 988(0.050,0.818)  | 1158(0.054,0.813) | 1251(0.043,0.803) |
|       |          | 0.075     | 427(0.056,0.800)  | 500(0.043,0.813)  | 541(0.052,0.808)  |
|       |          | 0.1       | 234(0.051,0.808)  | 274(0.057,0.789)  | 296(0.053,0.801)  |
|       | IM       | 0.05      | 1122(0.054,0.810) | 1294(0.053,0.810) | 1388(0.048,0.797) |
|       |          | 0.075     | 484(0.058,0.807)  | 559(0.053,0.793)  | 600(0.055,0.797)  |
|       |          | 0.1       | 265(0.058,0.806)  | 306(0.060,0.813)  | 329(0.046,0.802)  |
|       | MM       | 0.05      | 1131(0.049,0.829) | 1320(0.050,0.819) | 1429(0.043,0.801) |
|       |          | 0.075     | 488(0.046,0.802)  | 570(0.056,0.824)  | 617(0.051,0.799)  |
|       |          | 0.1       | 267(0.049,0.809)  | 312(0.053,0.809)  | 338(0.055,0.810)  |

Table 12: Sample size (empirical type I error, empirical power) for the comparison of slopes with  $\theta = 3$  and  $\bar{r} = 0.6$

|       |          | $\beta_4$ | $\rho = 0.1$      | $\rho = 0.3$      | $\rho = 0.5$      |
|-------|----------|-----------|-------------------|-------------------|-------------------|
| CS    | Complete | 0.05      | 1220(0.049,0.814) | 968(0.051,0.804)  | 715(0.070,0.800)  |
|       |          | 0.075     | 527(0.049,0.808)  | 420(0.066,0.809)  | 312(0.056,0.787)  |
|       |          | 0.1       | 289(0.056,0.804)  | 231(0.055,0.815)  | 173(0.068,0.807)  |
|       | IM       | 0.05      | 1418(0.048,0.801) | 1164(0.058,0.802) | 910(0.064,0.793)  |
|       |          | 0.075     | 613(0.053,0.807)  | 504(0.054,0.814)  | 396(0.056,0.797)  |
|       |          | 0.1       | 336(0.056,0.796)  | 277(0.065,0.803)  | 218(0.060,0.819)  |
|       | MM       | 0.05      | 1424(0.051,0.807) | 1182(0.059,0.791) | 940(0.067,0.794)  |
|       |          | 0.075     | 615(0.051,0.811)  | 511(0.057,0.788)  | 408(0.056,0.794)  |
|       |          | 0.1       | 337(0.053,0.816)  | 281(0.059,0.814)  | 225(0.067,0.806)  |
| AR(1) | Complete | 0.05      | 1482(0.051,0.816) | 1737(0.052,0.801) | 1877(0.058,0.817) |
|       |          | 0.075     | 640(0.053,0.804)  | 750(0.054,0.811)  | 811(0.057,0.801)  |
|       |          | 0.1       | 350(0.057,0.800)  | 411(0.051,0.810)  | 444(0.053,0.820)  |
|       | IM       | 0.05      | 1683(0.047,0.813) | 1940(0.047,0.811) | 2082(0.047,0.816) |
|       |          | 0.075     | 726(0.057,0.804)  | 838(0.047,0.827)  | 899(0.058,0.808)  |
|       |          | 0.1       | 398(0.050,0.821)  | 459(0.048,0.808)  | 493(0.053,0.825)  |
|       | MM       | 0.05      | 1696(0.056,0.813) | 1980(0.050,0.810) | 2143(0.047,0.814) |
|       |          | 0.075     | 732(0.051,0.821)  | 855(0.060,0.808)  | 925(0.064,0.814)  |
|       |          | 0.1       | 401(0.050,0.806)  | 468(0.054,0.810)  | 507(0.049,0.806)  |
